# Supplementary material for: Structural Characterization and Thermoelectric Properties of Br-Doped AgSnm[Sb0.8Bi0.2]Te2+m Systems
Source: MDPI journal article supplement (doi:10.3390/ma16155213), 2023-07-25

# Structural Characterization and Thermoelectric Properties of Br-Doped $\text{AgSn}_m[\text{Sb}_{0.8}\text{Bi}_{0.2}]\text{Te}_{2+m}$ Systems

Daniela Delgado <sup>1</sup>, Silvana Moris <sup>2</sup>, Paulina Valencia-Gálvez <sup>1</sup>, María Luisa López <sup>3</sup>, Inmaculada Álvarez-Serrano <sup>3</sup>, Graeme R. Blake <sup>4,\*</sup> and Antonio Galdámez <sup>1,\*</sup>

<sup>1</sup> Departamento de Química, Facultad de Ciencias, Universidad de Chile, Las Palmeras 3425, Santiago 7800003, Chile; daniela.delgado@ug.uchile.cl (D.D.); paulygav@uchile.cl (P.V.-G.)

<sup>2</sup> Centro de Investigación de Estudios Avanzados del Maule (CIEAM), Vicerrectoría de Investigación y Postgrado, Universidad Católica del Maule, Avenida San Miguel 3605, Talca 3480112, Chile; smoris@ucm.cl

<sup>3</sup> Departamento de Química Inorgánica, Facultad de Ciencias Químicas, Universidad Complutense, 28040 Madrid, Spain; marisal@quim.ucm.es (M.L.L.); ias@quim.ucm.es (I.Á.-S.)

<sup>4</sup> Zernike Institute for Advanced Materials, University of Groningen, Nijenborgh 4, 9747 AG Groningen, The Netherlands

\* Correspondence: g.r.blake@rug.nl (G.R.B.); agaldamez@uchile.cl (A.G.)

## Supplementary Materials

**Table S1.** Lattice parameters and *R*-indices obtained from Rietveld refinement of PXRD patterns, and relative densities of samples used in thermoelectric measurements.

| Composition                                                                     | <i>a</i> (Å) | %<br>Densification | Bragg <i>R</i> -factor | <i>R<sub>f</sub></i> -factor |
|---------------------------------------------------------------------------------|--------------|--------------------|------------------------|------------------------------|
| $\text{AgSn}_2[\text{Sb}_{0.8}\text{Bi}_{0.2}]\text{Te}_4$                      | 6.19012(7)   | 93.4               | 9.86                   | 10.4                         |
| $\text{AgSn}_2[\text{Sb}_{0.8}\text{Bi}_{0.2}]\text{Te}_{3.97}\text{Br}_{0.03}$ | 6.20021(5)   | 94.6               | 8.36                   | 8.52                         |
| $\text{AgSn}_4[\text{Sb}_{0.8}\text{Bi}_{0.2}]\text{Te}_6$                      | 6.23730(2)   | 94.2               | 8.46                   | 6.18                         |
| $\text{AgSn}_4[\text{Sb}_{0.8}\text{Bi}_{0.2}]\text{Te}_{5.97}\text{Br}_{0.03}$ | 6.24030(1)   | 93.2               | 11.4                   | 9.91                         |

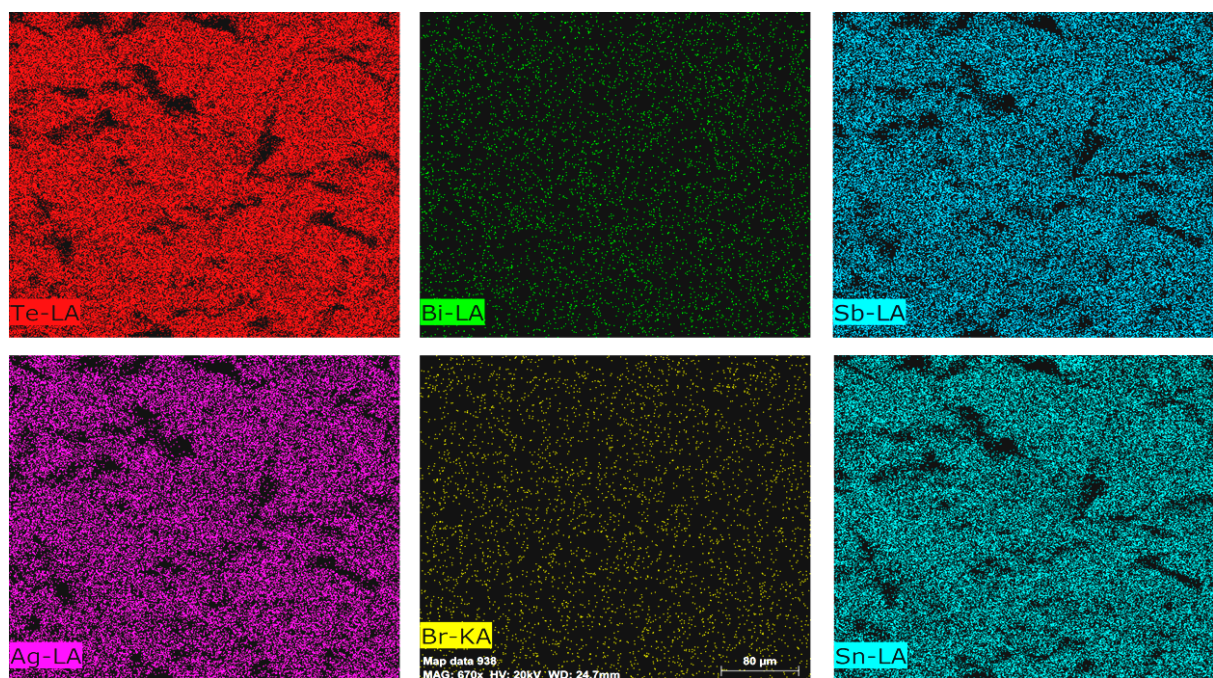

**Figure S1.** Representative energy dispersive x-ray (EDS) chemical mapping images of  $\text{AgSn}_4[\text{Sb}_{0.8}\text{Bi}_{0.2}]\text{Te}_{5.97}\text{Br}_{0.03}$  powder sample.

**Table S2.** EDS chemical analysis from HRTEM measurements of samples with nominal composition  $\text{AgSn}_2[\text{Sb}_{0.8}\text{Bi}_{0.2}]\text{Te}_4$  taken from different crystals and zones.

| Crystal        | Ag    | Sn    | Sb    | Te    | Bi   | Chemical composition                                               |
|----------------|-------|-------|-------|-------|------|--------------------------------------------------------------------|
| 1              | 11.10 | 29.33 | 4.44  | 52.00 | 3.13 | $\text{AgSn}_{1.6}(\text{Sb}_{0.4}\text{Bi}_{0.3})\text{Te}_{4.7}$ |
| 2              | 12.88 | 22.67 | 9.01  | 51.80 | 3.64 | $\text{AgSn}_{1.8}(\text{Sb}_{0.7}\text{Bi}_{0.3})\text{Te}_{4.0}$ |
| 3              | 13.91 | 21.99 | 8.77  | 52.24 | 3.09 | $\text{AgSn}_{1.6}(\text{Sb}_{0.6}\text{Bi}_{0.2})\text{Te}_{3.8}$ |
| 4              | 14.69 | 20.85 | 10.40 | 50.74 | 3.33 | $\text{AgSn}_{1.4}(\text{Sb}_{0.7}\text{Bi}_{0.2})\text{Te}_{3.5}$ |
| 5              | 14.16 | 23.81 | 8.22  | 50.43 | 3.38 | $\text{AgSn}_{1.7}(\text{Sb}_{0.6}\text{Bi}_{0.2})\text{Te}_{3.6}$ |
| Mean           | 13.17 | 22.71 | 8.30  | 51.43 | 4.39 | $\text{AgSn}_{1.7}(\text{Sb}_{0.6}\text{Bi}_{0.3})\text{Te}_{3.9}$ |
| Std. Deviation | 1.48  | 3.24  | 1.86  | 0.67  | 2.31 |                                                                    |

**Table S3.** EDS chemical analysis from HRTEM measurements of samples with nominal composition  $\text{AgSn}_4[\text{Sb}_{0.8}\text{Bi}_{0.2}]\text{Te}_6$  taken from different crystals and zones.

| Crystal        | Ag    | Sn    | Sb   | Te    | Bi   | Chemical composition                                               |
|----------------|-------|-------|------|-------|------|--------------------------------------------------------------------|
| 1a             | 7.60  | 34.53 | 4.12 | 51.83 | 1.91 | $\text{AgSn}_{4.5}(\text{Sb}_{0.5}\text{Bi}_{0.3})\text{Te}_{6.8}$ |
| 1b             | 7.62  | 35.12 | 4.17 | 51.13 | 1.95 | $\text{AgSn}_{4.6}(\text{Sb}_{0.5}\text{Bi}_{0.3})\text{Te}_{6.7}$ |
| 2              | 10.77 | 30.49 | 7.13 | 49.57 | 2.03 | $\text{AgSn}_{2.8}(\text{Sb}_{0.7}\text{Bi}_{0.2})\text{Te}_{4.6}$ |
| 3a             | 6.92  | 35.54 | 4.45 | 51.19 | 1.90 | $\text{AgSn}_{5.1}(\text{Sb}_{0.6}\text{Bi}_{0.3})\text{Te}_{7.4}$ |
| 3b             | 6.56  | 36.23 | 4.04 | 51.40 | 1.77 | $\text{AgSn}_{5.5}(\text{Sb}_{0.6}\text{Bi}_{0.3})\text{Te}_{7.8}$ |
| 4              | 8.69  | 30.42 | 6.48 | 52.27 | 2.13 | $\text{AgSn}_{3.5}(\text{Sb}_{0.7}\text{Bi}_{0.2})\text{Te}_{6.0}$ |
| 5a             | 8.61  | 29.20 | 7.41 | 52.14 | 2.65 | $\text{AgSn}_{3.4}(\text{Sb}_{0.9}\text{Bi}_{0.3})\text{Te}_{6.1}$ |
| 5b             | 7.47  | 32.33 | 7.87 | 50.41 | 1.93 | $\text{AgSn}_{4.3}(\text{Sb}_{1.1}\text{Bi}_{0.3})\text{Te}_{6.7}$ |
| Mean           | 8.03  | 32.98 | 5.71 | 51.24 | 2.03 | $\text{AgSn}_{4.1}(\text{Sb}_{0.7}\text{Bi}_{0.3})\text{Te}_{6.4}$ |
| Std. Deviation | 1.33  | 2.71  | 1.67 | 0.91  | 0.27 |                                                                    |

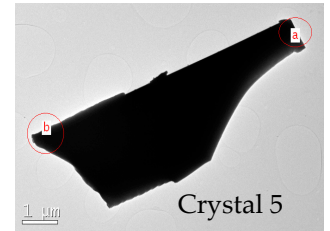

**Table S4.** EDS chemical analysis from HRTEM measurements of samples with nominal composition  $\text{AgSn}_4[\text{Sb}_{0.8}\text{Bi}_{0.2}]\text{Te}_{5.97}\text{Br}_{0.03}$  taken from different crystals and zones.

| Crystal        | Br   | Ag   | Sn    | Sb   | Te    | Bi   |
|----------------|------|------|-------|------|-------|------|
| 1              | 0.30 | 7.69 | 33.75 | 5.08 | 51.18 | 2.00 |
| 2a             | 0.29 | 8.28 | 32.75 | 4.64 | 51.94 | 2.08 |
| 2b             | 0.15 | 8.16 | 33.96 | 4.78 | 50.62 | 2.33 |
| 3              | 0.14 | 8.21 | 33.71 | 4.20 | 51.39 | 2.35 |
| 4a             | 0.38 | 8.45 | 32.32 | 5.13 | 51.19 | 2.53 |
| 4b             | 0.25 | 8.49 | 32.54 | 5.97 | 50.82 | 1.93 |
| Mean           | 0.25 | 8.22 | 33.17 | 4.97 | 51.19 | 2.20 |
| Std. Deviation | 0.09 | 0.29 | 0.71  | 0.60 | 0.46  | 0.23 |

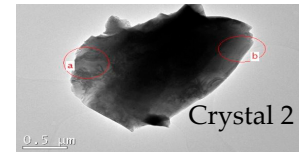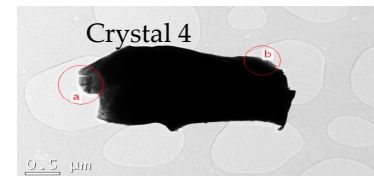

Supplement: s1 [file s1]
